# Supplementary material for: Radioembolisation with yttrium‒90 microspheres versus sorafenib for treatment of advanced hepatocellular carcinoma (SARAH): study protocol for a randomised controlled trial
Source: PubMed Central journal article supplement (PMC4265525; doi:10.1186/1745-6215-15-474), 2014-12-03
Supplement: 13063_2014_2333_MOESM1_ESM.pdf [file 13063_2014_2333_MOESM1_ESM.pdf]

The following ethics committee approved the SARAH trial for all participating centres:

CPP Ile de France XI, 20, rue Armagis, 78105 Saint Germain en Laye Cedex

Reference number: 11 051

N° IDRCB (EUDRA CT number): 2011-A00043-38

| <b>Participating centre</b>           | <b>Town/city</b>      | <b>Date ethics approval obtained</b> |
|---------------------------------------|-----------------------|--------------------------------------|
| Hôpital Beaujon                       | Clichy                | 09/06/2011                           |
| CHU d'Amiens                          | Amiens                | 09/06/2011                           |
| CHU d'Angers                          | Angers                | 09/06/2011                           |
| CHU Hôpital Côte de Nacre             | Caen                  | 09/02/2012                           |
| CHU de Grenoble                       | Grenoble              | 09/06/2011                           |
| CHU Edouard Herriot                   | Lyon                  | 09/06/2011                           |
| CCLC Paoli-Calmette                   | Marseille             | 09/06/2011                           |
| Hôpital Saint Eloi                    | Montpellier           | 09/06/2011                           |
| Hôpital de Brabois (CHU Nancy)        | Vandoeuvre les Nancy  | 09/06/2011                           |
| Hôpital Hôtel Dieu                    | Nantes                | 09/06/2011                           |
| CHU de Nice (Archet 1 et 2)           | Nice                  | 09/02/2012                           |
| Hôpital Saint Antoine                 | Paris Cedex 12        | 09/06/2011                           |
| HEGP                                  | Paris Cedex 15        | 09/06/2011                           |
| Hôpital Haut Lévêque                  | Pessac                | 09/06/2011                           |
| CHU de Poitiers                       | Poitiers              | 09/06/2011                           |
| Hôpital Nord - CHU de Saint Etienne   | Saint Priest en Jarez | 09/06/2011                           |
| Hôpital de Hautepierre                | Strasbourg            | 09/06/2011                           |
| Nouvel Hôpital Civil                  | Strasbourg            | 13/06/2013                           |
| Paul Brousse                          | Villejuif             | 09/06/2011                           |
| IGR                                   | Villejuif             | 09/02/2012                           |
| CHRU de Besançon, Hôpital Jean Minjoz | Besançon              | 09/02/2012                           |
| Bocage                                | Dijon                 | 09/02/2012                           |
| Centre Georges François LECLERC       | Dijon                 | 11/10/2012                           |
| CHU de Marseille, Hôpital la Timone   | Marseille cedex 5     | 09/02/2012                           |
| CHU Henri Mondor                      | Créteil               | 11/10/2012                           |
| Hôpital Jean Verdier                  | Bondy                 | 11/10/2012                           |
| Hôpital Lyon Sud                      | Pierre Bénite         | 13/06/2013                           |
| Hôpital de la croix rousse            | Lyon Cedex 04         | 13/06/2013                           |
| CHU Robert DEBRE                      | Reims                 | 13/06/2013                           |
| Hôpital Antoine Béchère               | Clamart               | 13/06/2013                           |
| Hôpital Le Kremlin Bicêtre            | Kremlin-Bicêtre Cedex | 13/06/2013                           |
